# Supplementary material
Source: PubMed Central journal article supplement (PMC7836245)
Supplement: mmc1.pdf [file mmc1.pdf]

## Supplementary Information

### One-step isothermal RNA detection with LNA-modified MNazymes chaperoned by cationic copolymer

Orakan Hanpanich, Ken Saito, Naohiko Shimada and Atsushi Maruyama\*

**Table S1** Oligonucleotide sequences and molecular weight.

| Name                   | Sequences (5'-3') <sup>a</sup>                        | Molecular weight (Da) <sup>b</sup> |
|------------------------|-------------------------------------------------------|------------------------------------|
| miR-21 (RNA)           | UAGCUUAUCAGACUGAUGUUGA                                | 7005.797                           |
| substrate              | AAGGTXTCCTCGUCCCTGGGCA-BHQ-1                          | 7789.990                           |
| Mz(10,11) partzyme I   | TCAACATCAGTACA <b>ACGAGAGGAAACCTT</b>                 | 8888.528                           |
| Mz(10,11) partzyme II  | <i>TGCCCAGGGAGGCTAGCTCTGATAAGCTA</i>                  | 8943.244                           |
| Lz3(10,11) partzyme I  | <u>TCA</u> <u>ACAT</u> CAGTACA <b>ACGAGAGGAAACCTT</b> | 8986.882                           |
| Lz3(10,11) partzyme II | <i>TGCCCAGGGAGGCTAGCTCTGATA</i> <u>AGCTA</u>          | 9041.671                           |
| Lz4(10,11) partzyme I  | <u>TCA</u> <u>ACAT</u> CAGTACA <b>ACGAGAGGAAACCTT</b> | 9014.446                           |
| Lz4(10,11) partzyme II | <i>TGCCCAGGGAGGCTAGCTCTGATA</i> <u>AGCTA</u>          | 9069.982                           |
| Mz(7,8) partzyme I     | TCAACATCAGTACA <b>ACGAGAGGAAAC</b>                    | 7991.414                           |
| Mz(7,8) partzyme II    | <i>CCAGGGAGGCTAGCTCTGATAAGCTA</i>                     | 8021.714                           |
| Lz3(7,8) partzyme I    | <u>TCA</u> <u>ACAT</u> CAGTACA <b>ACGAGAGGAAAC</b>    | 8090.126                           |
| Lz3(7,8) partzyme II   | <i>CCAGGGAGGCTAGCTCTGATA</i> <u>AGCTA</u>             | 8119.304                           |
| Lz4(7,8) partzyme I    | <u>TCA</u> <u>ACAT</u> CAGTACA <b>ACGAGAGGAAAC</b>    | 8117.033                           |
| Lz4(7,8) partzyme II   | <i>CCAGGGAGGCTAGCTCTGATA</i> <u>AGCTA</u>             | 8147.374                           |

<sup>a</sup> Boldface type indicates catalytic core residues in partzymes and RNA cleavage site in substrate; underlining indicates sites of LNA modification; italic type indicates substrate-binding arms; X in the substrate represents Fluorescein-dT.

<sup>b</sup>Molecular weight analyzed with MALDI-TOF mass spectrometer.

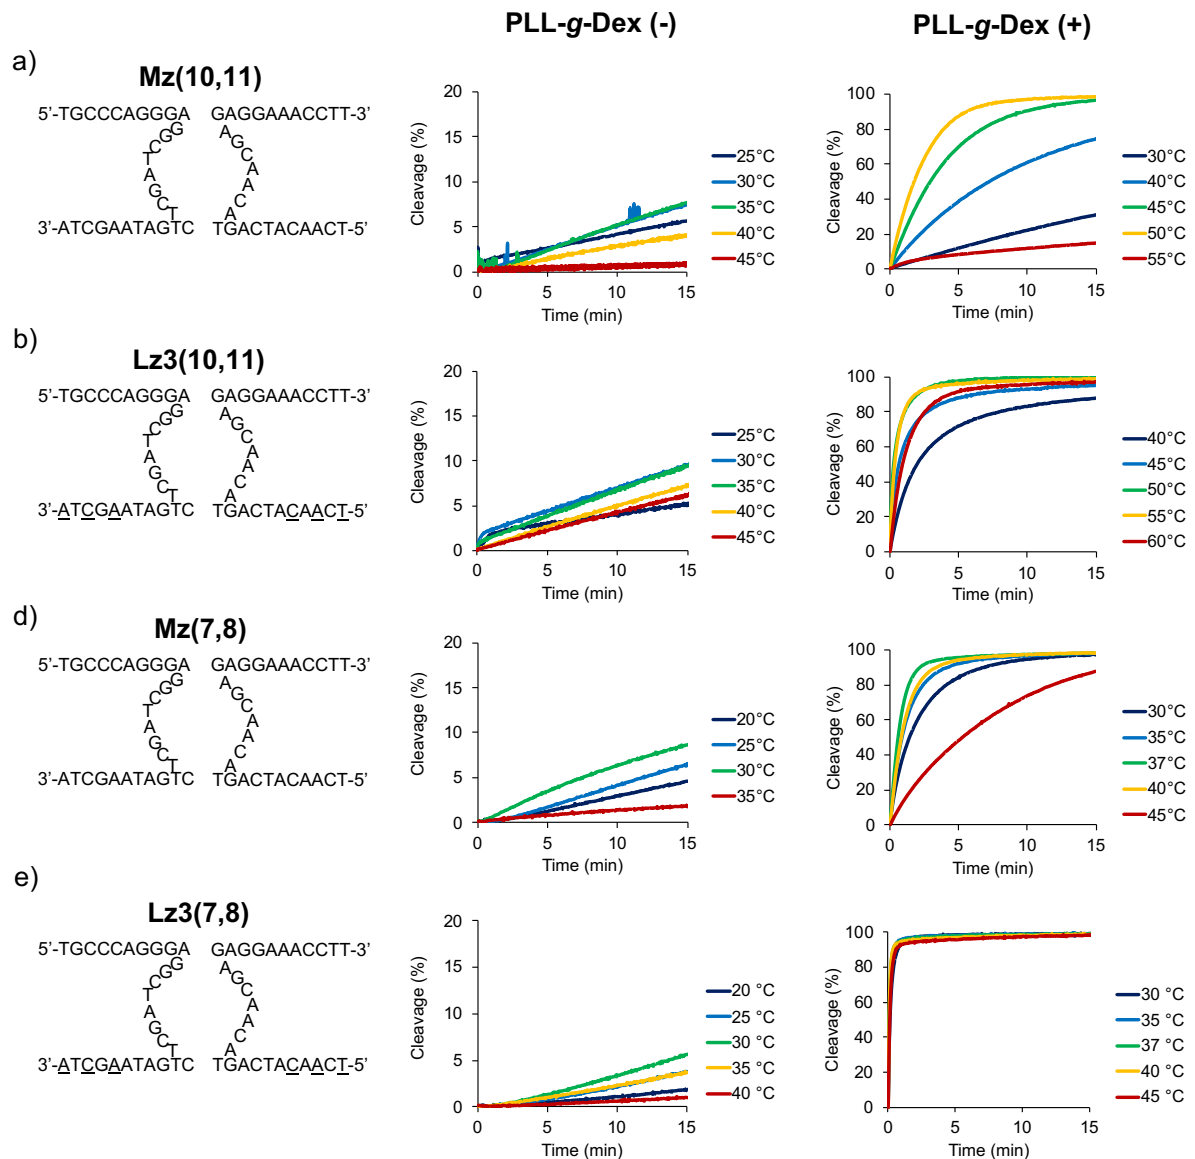

**Fig. S1.** Percentage of substrate cleavage over time by (a) Mz(10,11), (b) Lz3(10,11), (c) Mz(7,8), (d) Lz3(7,8) at different reaction temperatures. Reaction solutions contained 100 nM substrate, 20 nM each partzymes, and 20 nM miR-21 in the presence (N/P = 2) or absence of copolymer. Underlining indicates sites of LNA modification

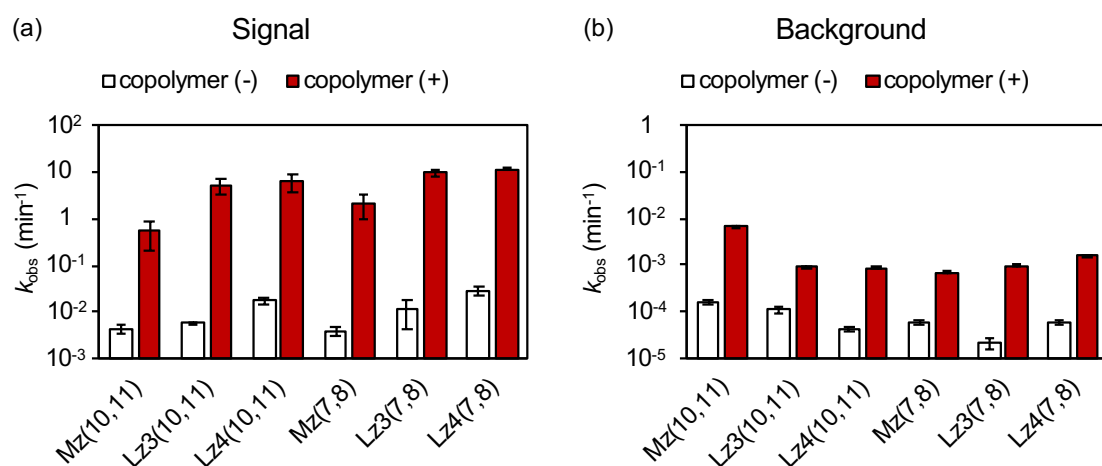

**Fig. S2.** Reaction rates of MNAzymes and LNA-modified MNAzymes (a) in the presence of 20 nM miR-21 target (signal) and (b) in the absence of miR-21 target (background). Reactions were performed with 100 nM substrate, 20 nM each partzyme, and 0 or 20 nM miR-21 at the optimal temperature for each condition. Experiments were repeated three times.

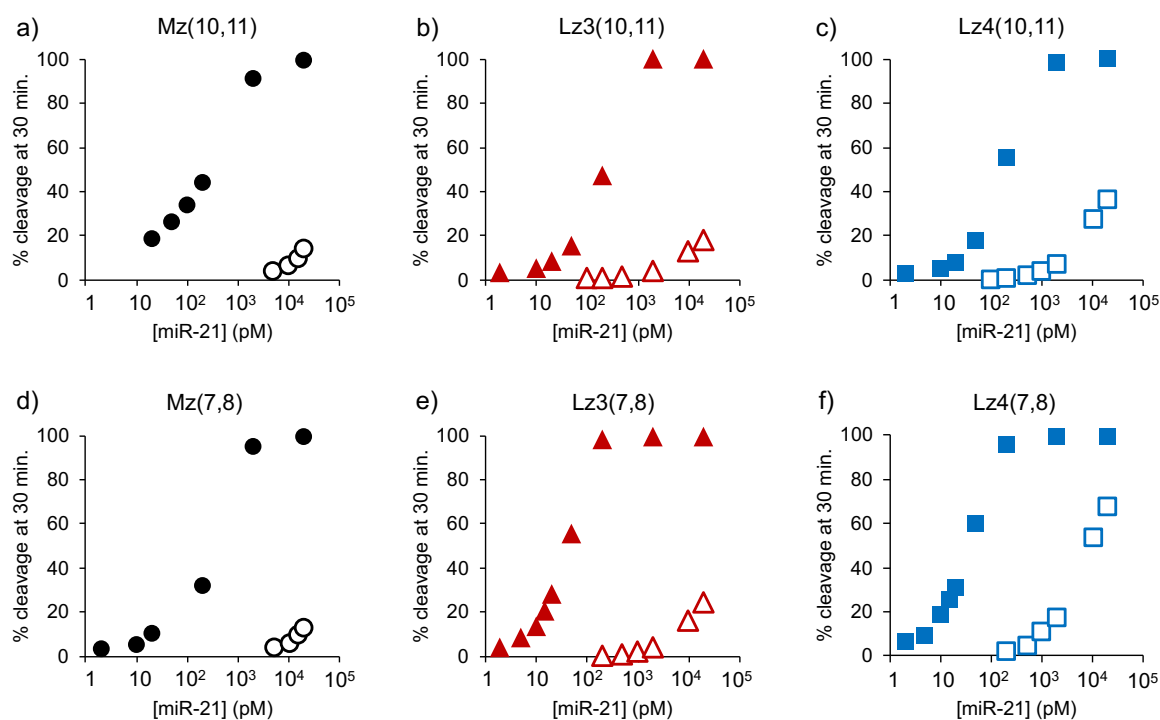

**Fig. S3.** Target concentration dependence of MNAzymes and LNA-modified MNAzymes at optimal temperatures. Reaction solutions contained 100 nM substrate, 20 nM each partzyme, and various miR-21 concentration as indicated, in the presence (closed symbols) or absence (open symbols) of PLL-g-Dex.

**Table S2** Comparison table for RNA detection by isothermal amplification methods.

| method                       | protein enzymes                                            | primers  | reverse transcription (RT) | additional amplification | temperature                         | reaction time            | sensitivity | ref.                      |
|------------------------------|------------------------------------------------------------|----------|----------------------------|--------------------------|-------------------------------------|--------------------------|-------------|---------------------------|
| RCA                          | DNA ligase and DNA polymerase                              | -        | -                          | strand displacement      | 37 °C (85 °C for heat inactivation) | 6.5 h                    | 3.2 pM      | (Wang et al., 2016)       |
| HCR                          | Horseradish peroxidase                                     | -        | -                          | -                        | Room temp.                          | 3 h                      | 32 fM       | (Ying et al., 2017)       |
| CHA                          | -                                                          | -        | -                          | -                        | 40 °C                               | 2 h                      | 3.5 pM      | (Liu et al., 2017)        |
| RT-LAMP                      | Reverse transcriptase, DNA polymerase                      | required | required                   | -                        | 63 °C (95 °C for heat inactivation) | 1.5 h                    | 100 copies  | (Teoh et al., 2013)       |
| RT-RPA (TwistAmp RT exo kit) | Reverse transcriptase, recombinase, DNA polymerase         | required | required                   | -                        | 40 °C                               | 20 min. (not include RT) | 10 copies   | (Teoh et al., 2015)       |
| CRISPR-Cas                   | Cas13a, reverse transcriptase, recombinase, DNA polymerase | required | required                   | RT-RPA                   | 37 °C                               | 3 h                      | aM          | (Gootenberg et al., 2017) |
| Our method                   | -                                                          | -        | -                          | -                        | 37 °C                               | 30 min.                  | 73 fM       |                           |

## References

- Gootenberg, J.S., Abudayyeh, O.O., Lee, J.W., Essletzbichler, P., Dy, A.J., Joung, J., Verdine, V., Donghia, N., Daringer, N.M., Freije, C.A., Myhrvold, C., Bhattacharyya, R.P., Livny, J., Regev, A., Koonin, E. V., Hung, D.T., Sabeti, P.C., Collins, J.J., Zhang, F., 2017. Nucleic acid detection with CRISPR-Cas13a/C2c2. *Science* 356, 438–442.
- Liu, C., Lv, S., Gong, H., Chen, C., Chen, X., Cai, C., 2017. 2-aminopurine probe in combination with catalyzed hairpin assembly signal amplification for simple and sensitive detection of microRNA. *Talanta* 174, 336–340.
- Teoh, B.T., Sam, S.S., Tan, K.K., Danlami, M.B., Shu, M.H., Johari, J., Hooi, P.S., Brooks, D., Piepenburg, O., Nentwich, O., Wilder-Smith, A., Franco, L., Tenorio, A., Abu Bakar, S., 2015. Early detection of dengue virus by use of reverse transcription-recombinase polymerase amplification. *J. Clin. Microbiol.* 53, 830–837.
- Teoh, B.T., Sam, S.S., Tan, K.K., Johari, J., Danlami, M.B., Hooi, P.S., Md-Esa, R., AbuBakar, S., 2013. Detection of dengue viruses using reverse transcription-loop-mediated isothermal amplification. *BMC Infect. Dis.* 13, 387.
- Wang, R., Wang, L., Zhao, H., Jiang, W., 2016. A split recognition mode combined with cascade signal amplification strategy for highly specific, sensitive detection of microRNA. *Biosens. Bioelectron.* 86, 834–839.
- Ying, N., Sun, T., Chen, Z., Song, G., Qi, B., Bu, S., Sun, X., Wan, J., Li, Z., 2017. Colorimetric detection of microRNA based hybridization chain reaction for signal amplification and enzyme for visualization. *Anal. Biochem.* 528, 7–12.
